# Supplementary material for: Development and application of the WRFDA-Chem 3DVAR system: aiming to improve air quality forecast and diagnose model deficiencies
Source: Copernicus journal article supplement (doi:10.5194/acp-2019-969), 2020-01-23
Supplement: Supplementary file 1 [file acp-2019-969-supplement.pdf]

# Development and application of the WRFDA-Chem 3DVAR system: aiming to improve air quality forecast and diagnose model deficiencies

Wei Sun<sup>1,2</sup>, Zhiqian Liu<sup>1\*</sup>, Dan Chen<sup>3\*</sup>, Pusheng Zhao<sup>3</sup>, and Min Chen<sup>3</sup>

<sup>1</sup> National Center for Atmospheric Research, Boulder, CO, 80301, USA

<sup>2</sup> National Space Science Center, Chinese Academy of Sciences, Beijing, 100190, China

<sup>3</sup> Institute of Urban Meteorology, China Meteorology Administration, Beijing, 100089, China

## 1. Bias for PM<sub>10</sub> in NODA run

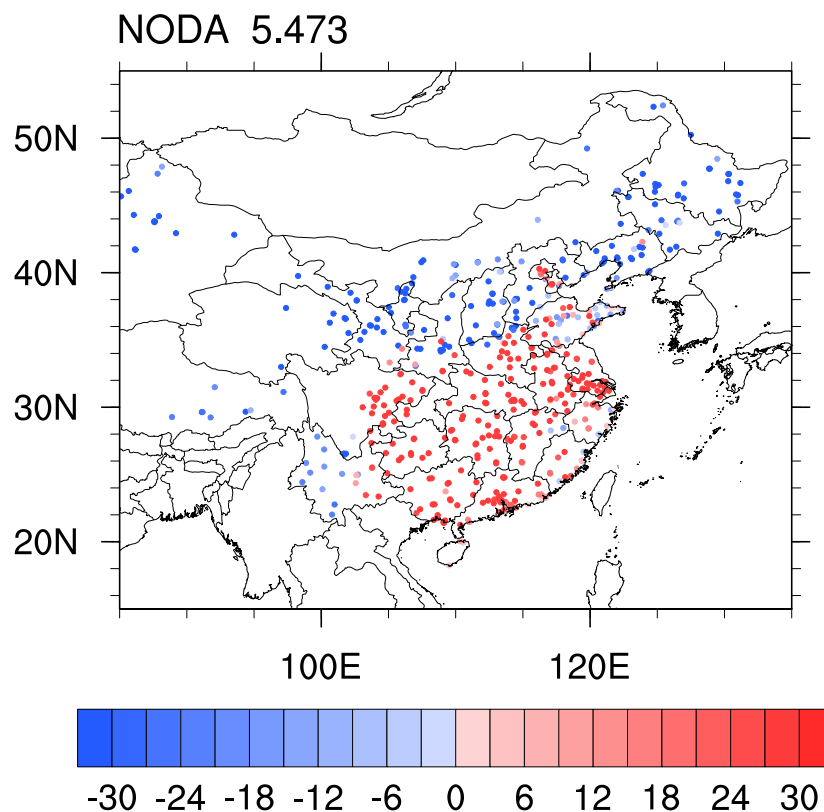

Fig. 1 Bias for PM<sub>10</sub> at 531 stations in NODA experiment.

---

\* Corresponding author: Dr. Zhiqian Liu ([liuz@ucar.edu](mailto:liuz@ucar.edu)) and Dr. Dan Chen ([dchen@ium.cn](mailto:dchen@ium.cn))

## 2. Threat score for air quality index

The threat score (TS) for air quality index (AQI) is calculated by

$$TS_i = \frac{H_i}{H_i + M_i + F_i} \quad (1)$$

where H, M, and F denotes the times of the hits, the misses, and the false alarms in the forecast of AQI, and  $i$  denotes the AQI levels from 1 to 6. In result, the TS is acquired at each AQI level ranging from 0 to 1. The higher (lower) TS represents the better (worse) forecast performance.
